# Supplementary material for: Structural basis for the endoribonuclease activity of the type III-A CRISPR-associated protein Csm6
Source: PubMed Central journal article supplement (PMC4748810; doi:10.1261/rna.054098.115), 2016-03
Supplement: supp_054098.115_SuppDataFile1.pdf [file supp_054098.115_SuppDataFile1.pdf]

Supplemental Data File 1. Multiple sequence alignment of TtCsm6 homologs.  
50 closest homologs of TtCsm6 (gi|499548365) were identified by Psi-BLAST and aligned  
using COBALT.

```
gi|499548365 ME-----D----LDALWERYREAVRAGGNPQA-----LYQEMV----WPALLAL
gi|570755047 ME-----D----LDALWERYREAVRAGGNPQA-----LYQEMV----WPALLAL
gi|499487817 ME-----D----LDALWERYREAVRAGGNPQA-----LYQEMV----WPALLAL
gi|551068805 MAENPLDRAGD---LEALWLQYKEAVRAGGNPHD-----LYQKMV----WPTLLEK
gi|516806813 MHD-----EG---LENVWQAYKEAVRAGGNPQT-----LYQEQV----WPALLDL
gi|740203173 ME--PLPNQGLD---LEALWQSYKEAVNAGGNAQA-----LYQERI----WPVLLEK
gi|489138195 MEE-----LQALWDRYKEAVRSGGNPQA-----LYQEMV----WPALVAR
gi|518381449 MQD-----LATLWEEYKQAVRAGG-----DAVGLYRERVPALLER
gi|746416481 MQD-----LATLWEEYKQAVRAGG-----DAVGLYRERVPALLER
gi|503470028 MPEKALNDPQAL-KEALEAWAEYKARVEEGG-----DPQTLYRERVPALLAL
gi|740224592 MQT--VNNPGD---LEPIWQAYREAVRAGG-----NPHTLYREMVPALLAL
gi|746419752 MLQ--DQERWNQ---LQEAWAREYKEAVGAGGNPQA-----LYQEMV----WPHLLEL
gi|740218035 MNER-----LGKLWQYKEKVKAGQ-----DPRTLYQOMVWVILLDS
gi|517272690 M--P-----SL-QAQLLEARKTLYERLDRGE-----DPTPFYNEAVWPLLLAL
gi|511098904 MGAE-----SL--RNRLEEARKTLYERLDRGE-----DPTPFYNEAVWPLLLAL
gi|753938889 -----MOKIHLAWQHLKTQELEGA-----RAQELYNQTVWPLLLLEL
gi|296849607 MED-----L--MOKIHLAWQHLKTQELEGA-----RAQELYNQTVWPLLLLEL
gi|701167105 MENH-----PL--EELERLWAEYKTKVKEGG-----NAQKLYRQEVWVPLLLQL
gi|502941971 MAEV--VEP----VELNDLWQFQKEMHASOGL-----EAANDFYDQHVWVPSLLLR
gi|648543053 MNRN-----KERLRQLWTRYKDLLGQGNIGRTEPSPQAKEARELYEKEIWPLT---
gi|654417026 MNQN-----KERLRELWAEYKTLIRQESADRAGPAPQGRAKELYDQTQIWLPT---
gi|502777546 MNQN-----KERLRELWAEYKTLIRQESANRAGSSPQAKAKELYDQTQIWLPT---
gi|654402559 MNQN-----KERLRELWVQYKTLIRQERANRGESSPKPTAKDLYDQTQIWLPT---
gi|302777911 MKEE-LKLTEEE---IERLLKEKTEIWETMQAKNA-----EYYYYNEIFPLVVDK
gi|779961749 MKEE-LKLSNDK---IESLLNEKAKI WETMQAKRA-----EYYYYDEIFPLVVKK
gi|505124139 MKEE-LKLSNDK---IESLLNEKAKI WETMQAKRA-----EYYYYDEIFPLVVKK
gi|502759809 MESE-GILSNSE---IEKKIKEKVEIWETKPAKEA-----EDYYYQEIFPLVVKK
gi|655943915 MESE-GILSNSE---IEKKIKEKVEIWETKPAKEA-----EDYYYQEIFPLVVKK
gi|125715920 -----
gi|489607383 MSDI----YAR---MKEKRDIIWYAMDRSNNEERM-----MAEYYKKEMLPLII EY
gi|754095284 -----LII EY
gi|489611620 M-EL----YKD---LMKKTIFWREMDRSSEKLRI-----ASEEYKKEMLPLII EY
gi|504021345 MNDI----YIK---MKEKRDIIWYAMDRSNNEERM-----LAEQYKKEMLPLII EY
gi|653611173 M-EL----YKD---LMKKTIFWREMDRSSEKLRI-----ASEEYKKEMLPLII EY
gi|605572971 MKTF----KES---FVQATAQWKLNRGTEEERR-----QADAFYKDHILPEVMMH
gi|740811186 MKTF----KES---FVQATAQWKLNRGTEEERR-----QADAFYKDHILPEVMMH
gi|516314532 MDRT-----A---LDQVI EQWQSLNNEERSQ-----FYDNHVFPALKE-
gi|655011063 MD-----FSEQLQRFRRVGNRRAE-----
gi|670513542 MD-----FSTQLQQFRERVGNRQAV-----
gi|500595682 M-----TASDKRI-----PFPEIF-----
gi|301057067 MLN----TSDHGPVDFGACVDRYHDIHQGRQYGDGTRA--EQATRFYLDHLLGETATR
gi|757183905 MNKELEKR-----TQEWMLERATLQRT-----KAEYYEKQLMKLIVDS
gi|501216200 MD-----FSEQLERFIARVDKRRTP-----
gi|501070122 M-----AQPTREAL-----PFPPMF-----
gi|703489217 MTG----EEAH----FDELAQMRRISLGEESYGDGLRPH--EQANEFYLDRLLGESVAR
gi|559063203 MGSL----DEKH-----SRMRRIFRGE EYGGGTAA--EQAQAFRLAEIYDEAVEV
gi|490153543 MNKELSR-----LTEQWKQMERKTEQORR-----LADAFYETDMMRLIEED
gi|548231998 MADETKRKTADETENPLQMMTEQWMLERKTTKQRE-----AADLFYEKLMNLI EDN
gi|656268823 MTVI----GSSRA---FADELAAFRRARTRDLGFR-----
gi|497885042 MKHH-----LAVYYEKLKQ-----NKDEA-----KEYYFQHMFDNVCHE
gi|585249330 -----

gi|499548365 WRE---KPRVYFPQAFVSVHTLGT-SPEATALAILGAGAERVYVLHTPESARF--LPR
gi|570755047 WRE---KPRVYFPQAFVSVHTLGT-SPEATALAILGAGAERVYVLHTPESARF--LPR
gi|499487817 WRE---KPRVYFPQAFVSVHTLGT-SPEATALAILGAGAERVYVLHTPESARF--LPR
gi|551068805 WRK---EPSVYSPQPFVSVIHTLGT-SPEATALAILGGAEQVYVLHTAESARF--LPR
gi|516806813 WRR---QPRVYPSRQPFVSVIHTLGT-SPEATALAILGTGAETVYVIHTRDSASF--LER
gi|740203173 WRQ---DPPVYPSRQPFQVSIHTLGT-SPEATALAILGAGADVYVLHTPESARF--LSR
gi|489138195 WKE---APNVHPRREAFVSVHTLGT-SPEATILAILGAGAERVYVLHTRESASY--LER
gi|518381449 WRQ---EPPVHPSQPEFAVSIHTLGT-SPEATVLAAILGTRAREVYVLHTDLTRAH--VPR
gi|746416481 WRQ---EPPVHPSQPEFAVSIHTLGT-SPEATVLAAILGTRAREVYVLHTDLTRAH--VSR
gi|503470028 WRA---EPPVHPRQPFVSIHTLGT-SPEAAIQAILGTGAEEVYVLHTTESTRF--LPR
gi|740224592 WRT---APQVYPERRSFRVSIHTLGT-SPEATTLAVLGTGAEEVYVLHTTESTRH--LDQ
gi|746419752 WRH---APPVSPERMVFRASLHTLGT-SPEATALAILGTGAQEVYVLHTTEESRRF--LER
gi|740218035 WKK---SPVVEPQKQFQVSIHTLGT-SPEATTLAILGTRSSSEVYVIHTPETRKY--LEQ
gi|517272690 WRE---DPPVPRFQPYEVS IHTVGT-SPEATILAILGTGAERVYVLHTTEESRRF--LER
gi|511098904 WRE---DPPVPRFQPYEVS IHTVGT-SPEATILAILGTGAGRVYLLHTTEESQRY--LER
gi|753938889 WRL---EPQVHPLRESFDVSIHTLGT-SPEATTLAALGLGADEIYVLHTPESRRY--LAQ
gi|296849607 WRL---EPQVHPLRESFDVSIHTLGT-SPEATTLAALGLGADEIYVLHTPESRRY--LAQ
gi|701167105 WKE---RPKVIPAPKPFDI SIHTLGT-SPEATILAILGTGADEIYILHTPETKAF--IAK
gi|502941971 WRA---QD----HGPRCNLSLHTLGT-SPEALILAATALRSEQIYIFYTDESEKY--LDR
gi|648543053 --K---EGFVDRGQQQYKASFHTVGT-TPEPVILSARALNAEKVYLLHTKDKTEKL--CER
gi|654417026 --K---EGFTDRGQQRYLASFHTVGT-TAEPVILSVRALDAKVYLLHTKDKTEKV--CGR
gi|502777546 --K---EGFTDRGQQQYVASFHTVGT-TAEPVILSVRALDAEKVYLLHTKDKTEKL--CGR
```

gi | 654402559 --K---EGFTDRGQRQYVASFHTVGT-TIEPVVLSTRALDAEKVYLLHTKDTERL--CGQ  
gi | 302777911 FRL---SISDEIQGK-YENLILSLGM-SFEPLVLTITALKPKRVFLYTEDSLKN--LDE  
gi | 779961749 FHL---SINNEFYGK-YENLILSLGM-SFEPLVLTIKALKPKRVFLYTEDSLKN--LDE  
gi | 505124139 FHL---SINNEFYGK-YENLILSLGM-SFEPLVLTIKALKPKRMVFLYTEDSLKN--LDE  
gi | 502759809 FHL---ETDVSFKEK-YENLILSLGF-SFEPLVLTISFIKPKQVFLYTKDSREN--LDK  
gi | 655943915 FHL---ETDVSFKEK-YENLILSLGF-SFEPLVLTISFIKPKQVFLYTKDSREN--LDK  
gi | 125715920 -----MVL-TLGT-SYEPLVLSISVLKPEKVLILYTDKSHHL--LDD  
gi | 489607383 FIQ---ENTKKISGNCAMVL-TLGT-SYEPLVLSISVLKPEKVLILYTDKSHHL--LDD  
gi | 754095284 FIQ---ENTKKISGNCAMVL-TLGT-SYEPLVLSISVLKPEKVLILYTDKSHHL--LDD  
gi | 489611620 FIQ---ENAKKISGSCAMVL-TLGT-SYEPLVLSISVLKPEKVLILYTDKSHHL--LDD  
gi | 504021345 FIQ---ENAKKISGSCAMVL-TLGT-SYEPLVLSISVLKPEKVLILYTDKSHHL--LDE  
gi | 653611173 FIQ---ENAKKISGSCAMVL-TLGT-SYEPLVLSIAVLKPEKVLILYTDKSHHL--LDD  
gi | 605572971 FRE---K---YAHSESCENLILTLGT-SYEPLVLSIALRPERVLIHSTRTRPL--LDD  
gi | 740811186 FRE---K---YAHSESCENLILTLGT-SYEPLVLSIALRPERVLIHSTRTRPL--LDD  
gi | 516314532 YVI---PREQQKHPQAYDCLILSVGL-SPEPIILSVLTFRPTQVCLLYTAESKKL--LDR  
gi | 655011063 -----ALILAGSRQEDTAALLIGALQPNRVAFLLTPETYDF--LRK  
gi | 670513542 -----ALILAGSRQEDTAALLIGALQPNRVAFLLTPETHDF--LEK  
gi | 500595682 --A---SFRATADGCAFRLV-LVGTQLQADTPALLIAGLNPERVAFLLTDQSRPK--LDE  
gi | 301057067 -AR---AESRLPARP-VDLLISLCLGF-TPVPTVLTHELLRPMVVRDAEDS--IDV  
gi | 757183905 FSE---NNKESIVGKT-DYLILSVGT-SYEPLVLSISLLNPKIMFLYTEKSEAS--IDK  
gi | 501216200 -----ALIPGSRQADTAALLIAALRPERVAFLLTPETTF--PAQ  
gi | 501070122 --Q---RFRSTIGDHAFRGLV-LVGTQLQADTPSLLIAGLNPERVAFLLTDQSRKGLVAQ  
gi | 703489217 -AS---RSLAQPPGD-VDLLISLCLGF-SPTTTLAFELLKPRRLVVITSEDAEES--INV  
gi | 559063203 -AQ---ANSADQPERVDLLISLCLGF-SPTTTLAFALTRPTRLIIITSEGTQKT--IDT  
gi | 490153543 FIA---RNREQVFEQA-DYFIVSVGT-SYEPVILNMKLFQPDRIFLYTEKTDV--LYK  
gi | 548231998 FIA---RNREQVEEV-EYLIVSVGT-SYEPLVLSIKLLNPKILFLFTAITEKY--LDK  
gi | 656268823 -----GLVLLGSRQSTTAALLIGALQVERVAFLLTDETRQM--PDD  
gi | 497885042 FKKKVAEQANREIQEYDYLIMTVGY-NIEPLVMWIKALSPKRVFFLCSDETEKY--VDE  
gi | 585249330 -----MSGL-TPLPTILAYDVLPRPKHLLVIYSEKAAGA--VDV

\*

gi | 499548365 LRQDTGKDLYP-----VEIGKSDVEAIYR-EVKRL-LEKHP-----EVP----  
gi | 570755047 LRQDTGKDLYP-----VEIGKSDVEAIYR-EVKRV-LEKHP-----EVP----  
gi | 499487817 LRQDTGKDLYP-----VEIGKSDVEAIYR-EVKRL-LEKHP-----EVP----  
gi | 551068805 LREDTGKDLYP-----LEIGKSDVAIYR-EVKRL-LERYP-----DVP----  
gi | 516806813 LRRDTGKDLYP-----LEVKGSDVAIYR-HVKDL-LERHP-----QVP----  
gi | 742023173 LRQDTGKDLYP-----IEIGKSDVAIYR-EVKRL-LEKHP-----GLP----  
gi | 489138195 LQKETGKPIYP-----LEVKGSDVAIYR-EVKRI-LDQHG-----DVP----  
gi | 518381449 LREETG---KE-----IYPLEVGKSDVAIYR-HVRYL-LERFP-----DVP----  
gi | 746416481 LREETG---KE-----IYPLEVGKSDVAIYR-HVRYL-LERFP-----DVP----  
gi | 503470028 LREETG---KE-----YPLEIQKSDVAIYR-KVREL-LEKRP-----EAL----  
gi | 740224592 LEADAN---RR-----VYPKEVHKSDVAQIYQ-QVYEI-LKRLP-----KDP----  
gi | 746419752 LRQDTGVIYYP-----IEIGKSDVAIYR-EVRKL-LERYP-----EEP----  
gi | 740218035 IRRDVG---VE-----LYPIEIEKNDVVTIYK-RIKEV-VERNI-----GKA----  
gi | 517272690 IQRETG---RE-----AYPIRVKSDVALIYK-TVAEL-LGRHR-----GAR----  
gi | 511098904 IQRETG---RE-----AYPIRVKSDVTLIYK-TVAEL-LGRHR-----GAR----  
gi | 753938889 LQQDLG---RP-----VYPIEIDKSDVTRLYQ-VVGEQ-VRKHP-----GKK----  
gi | 296849607 LQQDLG---RP-----VYPIEIDKSDVTRLYQ-VVGEQ-VRKHP-----GKK----  
gi | 701167105 LENETG---KK-----TYPIEVGKSDVAIYN-EVIKI-LEKNP-----DKW----  
gi | 502941971 VEAELG---KR-----VWAYNVSKDDPTTIYQ-RFQDV-LQRYP-----HAD----  
gi | 648543053 IEKELGWGVDL-----IKTLQVRSRDPEDIYR-QVRQO-IDRLD-----PKDP----  
gi | 654417026 IERELGWGVER-----IKTLLVGRSDPEDIYR-QVRQK-VDEIP-----PDAA----  
gi | 502777546 IERELGWGVER-----IKTLLVGRSDPEDIYK-QVRQK-VDELP-----PDAA----  
gi | 654402559 IEKELGWGVER-----IKTLLVGRSDPEDIYK-QVRQK-VDELP-----PDAA----  
gi | 302777911 VIKWTNLLPSQ-----YTAEEIVKDDPVDIYR-VLKKVYVDRWG-----CPDK----  
gi | 779961749 VIKWTNLLPSQ-----YVAEEIVKDDPVDIYR-VLKKVYVDRWG-----SPVK----  
gi | 505124139 VIKWTNLLPSQ-----YVAEEIVKDDPVDIYR-VLKKVYVDRWG-----SPGK----  
gi | 502759809 VIQWAGLLPSQ-----YVAEEIEKDNVPDIYR-VLKKIYVEKWN-----KPKD----  
gi | 655943915 VIQWAGLLPSQ-----YVAEEIEKDNVPEIYR-VLKKIYVEKWN-----KPKD----  
gi | 125715920 VIEFTKLKPSQ-----YVATDVDAENPLQLYR-KIKDV-YEKWG-----RPRN----  
gi | 489607383 VIEFTKLKPSQ-----YVATDVDAENPLQLYR-KIKDV-YEKWG-----RPRN----  
gi | 754095284 VIEFTKLKPSQ-----YVATDVDAENPLQLYR-KIKDV-YEKWG-----RPRN----  
gi | 489611620 VIEFTKLKPSQ-----YVATDVDAENPLQLYR-KIKDV-YEKWG-----RPRN----  
gi | 504021345 VIEFTKLKPSQ-----YIATDVDAENPLQLYQ-KIKDI-YEKWG-----RPNK----  
gi | 653611173 VIEFTKLKPSQ-----YIATDVDAENPLQLYQ-KIKDI-YEKWG-----RPNK----  
gi | 605572971 VIELTGLKPSR-----YISRMVNSENPLKLYQ-VVKEV-YEEDW-----RPGK----  
gi | 740811186 VIELTGLKPSR-----YISRMVNSENPLKLYQ-VVKEV-YEEDW-----RPGK----  
gi | 516314532 IDEANLKASQ-----IEMAEISETRLQNIYQ-KIREV-YEKWE-----RPTR----  
gi | 655011063 VAIKLGREPDQ-----RWISRTAHYTDVTQVYR-ELRAV-IEEWSDL--DRDQ----  
gi | 670513542 VAAKLDREPDQ-----TWIKRIAHYTDVNQVYR-ELRAV-IEEWSDL--DRDQ----  
gi | 500595682 VRQRLAQVADQAPLRCSPDDWFCPDGDYSSVLRVYT-GLRTV-LDRWRDL--ERHE----  
gi | 301057067 IHDRVTRPSGPL----RPRDFRHASCDPTDPLSIYR-IVKEE-LDRTPAGDGRP-Y----  
gi | 757183905 IVKFCGLDASI-----YDKRKVHETNPLSVYQ-EIKRA-YLMWN-----RPDK----  
gi | 501216200 MAERLGRQPAD-----GWLCKTARYTDINQVYR-ELRAV-IEAWSDL--EREQ----  
gi | 501070122 CRARLEQVADQVSLRCLPDADWFCPNGDHSNVLVSYT-GLRAV-LDRWNDL--ERHE----  
gi | 703489217 LGERIVG-SGKL----QHKDFLPRRCVPTDPLGIYR-IVAAE-LEEHHARRVGRPSL----  
gi | 559063203 IWEKLAG---KI----KFSEARHVTCDPDPTSIYDIVLKEV-RSLLAA--GRPPR----  
gi | 490153543 IVKYCKLEPDS-----YEKNKVSERNPLDIYR-EIKRQ-YLEWD-----KPKK----  
gi | 548231998 IVKHCLNPVSA-----FQKCIIVSETPEMDIYR-EIKKA-YIEWG-----KPEK----

gi | 656268823  
gi | 497885042  
gi | 585249330

VAALLGCSP-Q-----AWLCPQGNHNTTRAVYQ-GLRQV-LEQWADL--DRAA----  
ICKRAELIHTQ-----CDHEVIRKTNGTVDVYE-MINKF-IEKNR----IMQENKLN  
IGDHVVGPGQLKA-----SQFSHPVDPDPRIVYQ-VINEY-LARFN-----PADGR--

\*

gi | 499548365  
gi | 570755047  
gi | 499487817  
gi | 551068805  
gi | 516806813  
gi | 740203173  
gi | 489138195  
gi | 518381449  
gi | 746416481  
gi | 503470028  
gi | 740224592  
gi | 746419752  
gi | 740218035  
gi | 517272690  
gi | 511098904  
gi | 753938889  
gi | 296849607  
gi | 701167105  
gi | 502941971  
gi | 648543053  
gi | 654417026  
gi | 502777546  
gi | 654402559  
gi | 302777911  
gi | 779961749  
gi | 505124139  
gi | 502759809  
gi | 655943915  
gi | 125715920  
gi | 489607383  
gi | 754095284  
gi | 489611620  
gi | 504021345  
gi | 653611173  
gi | 605572971  
gi | 740811186  
gi | 516314532  
gi | 655011063  
gi | 670513542  
gi | 500595682  
gi | 301057067  
gi | 757183905  
gi | 501216200  
gi | 501070122  
gi | 703489217  
gi | 559063203  
gi | 490153543  
gi | 548231998  
gi | 656268823  
gi | 497885042  
gi | 585249330

-VALDLTSGTKAMSAGLAAAGFFQRFYPKVRVYVDNEDY-DPELRRP--RAGTEKLRI  
-VALDLTSGTKAMSAGLAAAGFFQRFYPKVRVYVDNEDY-DPELRRP--RAGTEKLRI  
-VALDLTSGTKAMSAGLAAAGFFQRFYPKVRVYVDNEDY-DPELRRP--RAGTEKLRI  
-VALDLTSGTKAMSAGLAAAGFFQRFYPKVRVYVDNEDY-DPELRRP--RAGTERLVI  
-VALDLTSGTKAMSAGLAAAGFFQRFYQVRVYVDNEAY-DPELRRP--RAGTERLVI  
-VALDLTSGTKAMSAGLAAAGFFQRFYPEVRVYVDNEVY-DPELRRP--KAGTERLII  
-VALDLTSGTKAMSAGLAVAGFFRRFYPKARVYVDNEDY-DSELRRP--RAGTERLII  
-VALDLTSGTKAMSAGLAAAGFFQRFYPEVRVYVDNDDY-DPELRRP--RAGTERLII  
-VALDLTSGTKAMSAGLAAAGFFQRFYPEVRVYVDNDDY-DPELRRP--VAGTEKLII  
-VALDVTGGTKAMSAGLAAAGFFQRFYQVRVYVDSGEY-DVKLRRP--RAGTERLIV  
-VALDITSGTKAMSAGLAAAGFFRRHYSNLQVYVDNEEY-DQELRRP--KAGTERLMI  
-VALDVTSGTKAMSAGLAAAGFFRRFYPKVYVDNEDY-DVALRRP--RAGSEKLIV  
-VALDVTGGTKAMSAGLAAAGFFRRFYFNIRVYVDNEEY-DEELRRP--VAGTEKLVI  
-VALDLTSGTKAMTSLGAAAFFLQRIHSEVQVYVDNEGY-DPRLRRP--IPGTEYLV  
-VALDLTSGTKAMTSLGAAAFFLQRIHSEVQVYVDNEGY-DPRLRRP--IPGTEYLV  
-IALDLTSGTKAMSAGMAAGYFLQRVHPSLRVAYVDNDAF-DVALRKP--VAGTEKLII  
-IALDLTSGTKAMSAGMAAGYFLQRVHPSLRVAYVDNDAF-DVALRKP--VAGTEKLII  
-VALDLTSGTKAMSSGLGAAGFFRRFYDKLRVYVDNDLY-DVEVRRP--KAGSERMVI  
-IAVDITSGTKPMVTGLGAAAFSAMTFYKLRVYVNGE-F-DPAARRP--RAGSEALIQ  
-IAFDPTGGTKAMVAGLAMFAFSLAEEGRITAHVYVDNEEY-DDQLRRP--VAGTEFLKR  
-IAFDPTGGTKAMVAGLAMFAFSLAEEGRITAHVYVDNEEY-DDELRRP--VAGTEFLKR  
-IAFDPTGGTKAMVAGLAMFAFSLAEEGRITAHVYVDNEEY-DDELRRP--VAGTEFLKR  
-IAFDPTGGTKAMVAGLAMFAFSLAEEGRITAHVYVDNEEY-DDELRRP--VAGTEFLKR  
-IAFDPTGGTKAMVAGLAMFAFSLAEEGRITAHVYVDNEEY-DDELRRP--VAGTEFLKR  
-TAIDFTGGTKMSAGIAMAGAYF-----KIDLIVYAS-DY-NNKMRKP--KPGTEKLK  
-TAIDFTGGTKMSAGIAMAGAYF-----KIDLIVYAS-EY-NSKMRKP--KPGTEELKF  
-TAIDFTGGTKMSAGIAMAGAYF-----KIDLIVYAS-EY-NSKMRKP--KPGTEELKF  
-TAIDFTGGTKMSAGIAMAGAYL-----KIDLIVYAS-EY-NNKMRKP--WPGTEKLK  
-TAIDFTGGTKMSAGIAMAGAYL-----KIDLIVYAS-EY-NNKMRKP--WPGTEKLK  
-IYVDFTGGTKMSAAGCAMAGSAI-----GAKLIYIAG-NF-LTDLRKP--EPGSEKLCY  
-IYVDFTGGTKMSAAGCAMAGSAI-----GAKLIYIAG-NF-LTDLRKP--EPGSEKLCY  
-IYVDFTGGTKMSAAGCAMAGSAI-----GAKLIYIAG-NF-LTDLRKP--EPGSEKLCY  
-IYVDFTGGTKMSAAGCAMAGSAI-----GAKLIYVGG-NF-LPDLRKP--EPGSEKLCY  
-IYVDFTGGTKMSAAGCAMAGSAI-----GAKLIYVGG-NF-LPDLRKP--EPGSEKLCY  
-IYVDFTSGTKMSMTAGCAMAGSVI-----NAKFVYIAS-HY-LADLRKP--EPGSETLSY  
-IYVDFTSGTKMSMTAGCAMAGSVI-----NAKFVYIAS-HY-LADLRKP--EPGSETLSY  
-IAVDPTGGTKAMVAGCTLAGNLI-----GADLVYVSS-DY-NTILRKP--NPGSESLLI  
-ILVDLTAGTKPMTVGLAKAAAYVL-----GLGAIYIESDY----EQNQV--VPGSQRLLI  
-ILVDLTAGTKPMTVGLAKAAAYVL-----GLGTIYIESDY----EQNQV--VPGSQRLLI  
-IAVDLTGGKSTMTVGLAKAAHVL-----RLAAVYVDS----DYADGRP--VPGTQRLAT  
-AIIIDITGGRKMSAAAAMAQWL-----KLELSYVEG-RF-DPHTRHP--IPGTDRLLI  
-IYIDFTGGTKMSAAAAMAGAMI-----DIQLVYVGTEDY-LVHFRKP--MPGSERLYY  
-ILVDLTGGTKPMTVGLAKAAAYVL-----GLGTIYIESDY----AQNRV--IPGTQRLIE  
-IAVDLTGGKATMTVGLAKAAHVL-----RLASVYVDS----DYADNRP--IPGTQRLAT  
-AYIDITGGRKMSAAAALAQWL-----DLRICYVES-DW-DPMLRRA--VPGSDRLLL  
-VIIDITGGKMSAGAALAASQL-----DLPCYIDS-TF-DPEMRQA--LPGSERLCV  
-IYIDFTGGTKMSAAAAMAGAMI-----DIQLVYVGTFRNY-MNDFRKP--EPGSETLFI  
-LHIDITGGTKMSAAAAMAGAVI-----DIQLIYVGSNHY-LPDRFRP--CPGSETLFI  
-IAVDVTGGLKPMVAGLEKAAHVL-----GLTTIYVESDYGPLPDPGRGPLGTQRLII  
RVAIDITDGTSMVTGCTLTANHL-----GMDLLYIHKEES-D--SGYL----GKEEPMI  
-VILNVTGGKMSAAAALAQWL-----DLELCYLDG-EV-EDAIGSV--IPYQRLLL

\* \* \*

\*

\*

gi | 499548365  
gi | 570755047  
gi | 499487817  
gi | 551068805  
gi | 516806813  
gi | 740203173  
gi | 489138195  
gi | 518381449  
gi | 746416481  
gi | 503470028  
gi | 740224592  
gi | 746419752  
gi | 740218035  
gi | 517272690  
gi | 511098904  
gi | 753938889  
gi | 296849607  
gi | 701167105  
gi | 502941971  
gi | 648543053  
gi | 654417026

LPNPHEALAEVDALFAKELYGKGEFGQAAAYFRGMVGRGTGNQA----YALYALLAEMYRA  
LPNPHEALAEVDALFAKELYGKGEFGQAAAYFRGMVGRGTGNQA----YALYALLAEMYRA  
LPNPHEALAEVDALFAKELYGKGEFGQAAAYFRGMVGRGTGNQA----YALYALLAEMYRA  
LPNPHEALAEVDALFAKELYGRGEFGAAGYFRGMVGTGDQR----YLYKMLAEMYHA  
LPNPHEVLGGVDALFARELYERGEYAKAADLFGAMVQKTLE-RR---FEVFGLLAGMYQA  
LPNPHEVLAEVDALLARELYTKGEFGQAAKVFGEVGTGDRR----YELYAVLCQMYQR  
LQDPHEVLGEVDALFAKELYGRGEFGAQAARYFQKMGVGTGDGR----WPLYQSLAEMYEA  
LPNPHQVLADVDALFARELYERGEYAKAADLFGAMVQKTLE-RR---FEVFGLLAGMYQA  
LPNPHQVLADVDLFARELYERGEYAKAADLFGVVMVQKTLE-RR---FEVFGLLAGMYQA  
LPNPHEVVEVDALFAKELYKEDYGAARYFSGLVGKTGD-QA---YTYLAMLAEYAAA  
LPNPHEAVGEVDLLAQELYEGDFTGASGYFSGLVKQGTGR-QE---YVLYATLSEMYGA  
LPDPHEVGGVDWLFASELYKEDFAGAASYFNRLVGTAGNQA----YTYLQNLAEYARA  
LPSPEVLGDVDLFALEHYSGEFYEAQRYFRETAKTKD-NR---YVLYALCVMYHA  
LPNPHEVLGDVDEHLARSFYREGEFKKASAYFYETAKKTGQ-EG---FRLYGHLAKVYQS  
LPNPHEVLGDVDEHLARSFYREGEFKKASAYFYETAKKTGQ-EG---FRLYGHLAKVYHS  
LPNPHEVLGDVDEHLAQEFYKAREFGKAADRYNELRRKTGQ-GG---FEVYALCEMYQR  
LPNPHEVLGDVDEHLAQEFYKAREFGKAADRYNELRRKTGQ-GG---FEVYALCEMYQR  
LQSPHEVLADVDLLLALHEHYEKGDYISAQRYFLQAREKTGS-KK---YEIYEDISLMYAF  
INDPLGAFGDLEQYAKALYNAQEYTLAAREFIRIADRTGDRR---FSPYAKLSEAYAA  
LENPREVIDWLYNRKDEAYSQGFARAKQNFSAAREEGK--A---NSLEAILSEAYAH  
LENPREVIDSWIYHRAKDAYKRGDFSLAKQLFQAKDHEGR--A---HSLEAVLAEAYES

gi | 502777546 LENPREVIPDWIYHRAKDAYKRGDFSLAKQLFDQAKDREGR--A---HSLEAVLSEAYES  
gi | 654402559 LENPREIIPDWIYHRAKDAYARGDFSLAKQLFEQAKDREGR--A---HSLEAVLSEAYES  
gi | 302777911 VEDPYHVFGDLEKDKAIALFNKNEFVSAYNIFSDLEDRVADRD---YTFYKLLSNIYRL  
gi | 779961749 VEDPYHVFGDLEKDKAIALFNKNEFVSAYNIFSDLEERVADRD---YIFYKLLSNIYRL  
gi | 505124139 VEDPYHVFGDLEKDKAIALFNKNEFVSAYNIFSDLEERVADRD---YIFYKLLSNIYRL  
gi | 502759809 VEDPYEVFGDLEKDKAIALFNKMGDFASAYKIFSELEERVAYRD---YTFYKMLSQIYSC  
gi | 655943915 VEDPYEVFGDLEKDKAIALFNKMGDFASAYKIFSELEERVAYRD---YTFYKMLSQIYSC  
gi | 125715920 IDDPYTVFGDLEREQAISLFNKMDYVSAYRIFEELEQRPVPGTK---EYSALKYISKAYNA  
gi | 489607383 IDDPYTVFGDLEREQAISLFNKMDYVSAYRIFEELEQRPVPGTK---EYSALKYISKAYNA  
gi | 754095284 IDDPYTVFGDLEREQAISLFNKMDYVSAYRIFEELEQRPVPGTK---EYSALKYISKAYNA  
gi | 489611620 IDDPYTVFGDLEREQAISLFNKMDYVSAYRIFEELEQRPVPGTK---EYSALKYISKAYNA  
gi | 504021345 IDDPYTVFGDLEREQAISLFNKMDYVSAYRIFEELEQRPVPGTK---EYSALKYISKAYNA  
gi | 653611173 IDDPYTVFGDLEREQAISLFNKMDYVSAYRIFEELEQRPVPGTK---EYSALKYISKAYNA  
gi | 605572971 IENPYEVFGDIERDRAVTLFNGMDYASAAEIFDELRRKVPGLHE---FEALGLLSKAYDN  
gi | 740811186 IENPYEVFGDIERDRAVTLFNGMDYASAAEIFDELRRKVPGLHE---FEALGLLSKAYDN  
gi | 516314532 LDNPYDVFGDLEFKAQALFRQLDYSSKIILENLEHKTSTPDR---YKPLALCSAYAH  
gi | 655011063 PSDPYEVFGDLEAAQARRLFNAHDYVNSERIYRDLAQRVKENKG---YEQLALLARAYAQ  
gi | 670513542 PSDPYEVFGDLEAAQARRLFNAHDYVNSERIYRDLAQRVKENKG---YEQLALLARAYAQ  
gi | 500595682 PEDPYTVFGDLEAAEARRLHNNHDYASAEKIFRDLAQRVPDNP---DYAIYADLSTAYLA  
gi | 301057067 LDDPTTLFGEQEMGRALEIFRAGAFEAARRRYDELCE'TLAVPVR---ARYMRALSEMYRA  
gi | 757183905 ISNPYEVFGDLEIEKALSFGKYNAGACEKLEILKDKVPDPAIROQLEFVYQLAVTYEA  
gi | 501216200 PSDPYEVFGDLEAGEARRLFNAHDYVNSERIYADLARRVPAEDG-TFYACMAQLSARAYTQ  
gi | 501070122 PEDPYLTVFGDLEAAEACRLHNNHDYAGAERVFRDLARRVDPKQ---DYAIYADLSAAYLA  
gi | 703489217 LDNPYTVFGDLEAAEACRLHNNHDYAGAERVFRDLARRVDPKQ---DYAIYADLSAAYLA  
gi | 559063203 LDNPYTVFGDLEAAEACRLHNNHDYAGAERVFRDLARRVDPKQ---DYAIYADLSAAYLA  
gi | 490153543 ISNPLAVFGDLEIEKAFALFNGMDYASAAEIFDELRRKVPGLHE---FEALGLLSKAYDN  
gi | 548231998 IANPLSVFGDLEIEKAFALFNGMDYASAAEIFDELRRKVPGLHE---FEALGLLSKAYDN  
gi | 656268823 PEDPYVTVFGDLEAAEQRLYRKHHDYAGAQRIFAALAERVPPPDG---RYALLAQLAAAYAA  
gi | 497885042 LQDPLVTVFGDLEAAEQRLYRKHHDYAGAQRIFAALAERVPPPDG---RYALLAQLAAAYAA  
gi | 585249330 LDNPYTVFGDLEAAEACRLHNNHDYAGAERVFRDLARRVDPKQ---DYAIYADLSAAYLA

\*

\*

gi | 499548365 WRALDFGEALKAGRKLL--GQLSQNVWLN---HPL-----NARREALEAQVALLEAVDR  
gi | 570755047 WRALDFGEALKAGRKLL--GQLSQNVWLN---HPL-----NARREALEAQVALLEAVDR  
gi | 499487817 WRALDFGEALKAGRKLL--GQLSQNVWLN---HPL-----NARREALEAQVALLEAVDR  
gi | 551068805 WRTLDAQAVRQGRALL--GRLESENWLO---HPL-----NERRKALEAQVGLLEVVQS  
gi | 516806813 WQALDFSEALKQKGLL--DRLSQDVWLN---HPL-----NRARGDLEAQVGLLEVEGR  
gi | 740203173 WYDLDFGGAKEAKKLL--GRLESENWLO---HPL-----NQRGALEGOARLLEVEG  
gi | 489138195 WHALNPFPAHKKGSGLL--DKLAQNAWLN---HPL-----NRSRDLEKQVSLLEAGKA  
gi | 518381449 WYALDFAEAVRKGALL--GRLEADALRQ---HPL-----NRRGILEGQSLLRARD  
gi | 746416481 WYALDFAEAVRKGALL--GRLEADALRQ---HPL-----NRRGILEGQSLLRARD  
gi | 503470028 WQALDFKEAARKGOTLQ--RALEKDTWLO---HPL-----GOHLSRLRRQVLELAAAE  
gi | 740224592 WWALKFEEALRKGKSL--EALGNDPYLL---HPL-----NRQRPRLQAVLELLEENR  
gi | 746419752 WRALDFKEAARKAESLL--ERLRKNVWLO---HPL-----NRHFQRLGQASLLKARD  
gi | 740218035 WYSLDIETAFEKSRKLV--EELQTDWLN---HPL-----GKSRGFETQSKILEAKR  
gi | 517272690 WKDLDFPKAKKDLTLL--RDLDRDAHLN---HPL-----NARRKDLAQVGLSAILA  
gi | 511098904 WKDLDFPKAKKDLTLL--RDLDRDAHLN---HPL-----NARRKDLAQVGLSAILA  
gi | 753938889 WYALDFEGALSNAERLL--KFLSQDAYRN---HPL-----NLRAQRIKEQKEGLEGIVS  
gi | 296849607 WYALDFEGALSNAERLL--KFLSQDAYRN---HPL-----NLRAQRIKEQKEGLEGIVS  
gi | 701167105 WYNLNFQKAYKSVQII--EKLNDKHSK---HLK-----ILNYNLFEQSELLKHMNE  
gi | 502941971 WLSNRFESAHAHAFGLF--SELDKPGFQT---HPL-----REQLPVLKQHDGVLKLT  
gi | 648543053 IDAAQFESAKTKLEELR--SLLQKPPYKQ---SPFQYNTNIREQKEGLEEIIYLANLSS  
gi | 654417026 LDAAQFQKQAKDRNLNLL--ELLQKPAHRQ---SFLTKHTATIERQKEALEAVVQVLESLSV  
gi | 502777546 LDAAQFQKQAKDRNLNLL--ELLQKPAHRQ---SFLTRNIATIERQKEALEAVVQVLESLSV  
gi | 654402559 LDAAQFQKQAKDRNLKELL--ELLQKPIHRQ---SFLTKYIAAIIERQKEALEAVVQVLDALSS  
gi | 302777911 WDCLFFDECIREFEKL--SILKAWRYVE--KDLA-----YKYETLYNQYRLIKPLES  
gi | 779961749 WDCLYFNECIKEFEKLF--SILKAWRYVE--KDLA-----YKYETLYNQYRLIKPLES  
gi | 505124139 WDCLYFNECIKEFEKLF--SILKAWRYVE--KDLA-----YKYETLYNQYRLIKPLES  
gi | 502759809 WDNLSFNEAIEGFELF--KILKSWKPID--KDIIG-----YKYEILYKQHELIKPLEK  
gi | 655943915 WDNLSFNEAIEGFELF--KILKSWKPID--KDIIG-----YKYEILYKQHELIKPLEK  
gi | 125715920 WDSLDISGAADNLSKCY--EIVVTEGKID--KSFVL-----NSHIEKLEKQVLRVLEK  
gi | 489607383 WDSLDISGAADNLSKCY--EIVVTEGKID--KSFVL-----NSHIEKLEKQVLRVLEK  
gi | 754095284 WDSLDISGAADNLSKCY--EIVVTEGKID--KSFVL-----NSHIEKLEKQVLRVLEK  
gi | 489611620 WDSLDISGAADNLSKCY--EIVVTEGKID--KSFVL-----NSHIEKLEKQVLRVLEK  
gi | 504021345 WDSLDISKASENLSRCC--EIIETEGKLE--KGFTL-----SSHIEKLEKQVLRVLEK  
gi | 653611173 WDSLDISKASENLSRCC--EIIETEGKLE--KGFTL-----SSHIEKLEKQVLRVLEK  
gi | 605572971 WDSLNLGAYDYMSKCC--EILSLLSLTGSATLL-----APHKSRLEQQLRLIGKLD  
gi | 740811186 WDSLNLGAYDYMSKCC--EILSLLSLTGSATLL-----APHKSRLEQQLRLIGKLD  
gi | 516314532 WDDLKIKDSVTLRLSK--DCLQRYLRLKTDSTIL-----SSYPTILEQIQITLENL  
gi | 655011063 WDTFDLAAAETAQQLASLITELRVQ--ORLL-----EAQRDAINHLSTMQAMNN  
gi | 670513542 WDTFDLAAAETAQQLASLITELRVQ--ORLL-----EAQRDAINHLSTMQAMNN  
gi | 500595682 WDSFAPHQAGDALDRVL--ARADLPADLQPARSVL-----QAQRETLAQLTAINRRLTQ  
gi | 301057067 WCDLIDLALPAVADALR--QALTVQVRRD-----LG-----VEHVDLLEEQVAFSLR--  
gi | 757183905 WDALFESKAYEAIKSLY--KDMVRDRKIH--TDYIL-----MDFCELIEKQVLEIPMTK  
gi | 501216200 WESFDITTAVKTMADLLAQLSITELRVQ--ORLL-----HDYQALISLDTATIKAMN  
gi | 501070122 WDSFVQPAPAMALDRVL--AHNVLPDALQARRVTL-----EAQRQALQVLTAINQCLTN  
gi | 703489217 WCALLESALPTSIDRVH--ATLSPIRGS-----LS-----VETTSLSERQVLSFSLR--  
gi | 559063203 WCNLDVDGLPELIRVR--EHLRENMA-----LA-----VPVQRIAKQLEFAEAL--  
gi | 490153543 WDALDFLPAYEHMSALN--WQLRRDRKQH--RKFLM-----MDFCTLLEQVLEIISYLKE



gi | 654417026  
gi | 502777546  
gi | 654402559  
gi | 302777911  
gi | 779961749  
gi | 505124139  
gi | 502759809  
gi | 655943915  
gi | 125715920  
gi | 489607383  
gi | 754095284  
gi | 489611620  
gi | 504021345  
gi | 653611173  
gi | 605572971  
gi | 740811186  
gi | 516314532  
gi | 655011063  
gi | 670513542  
gi | 500595682  
gi | 301057067  
gi | 757183905  
gi | 501216200  
gi | 501070122  
gi | 703489217  
gi | 559063203  
gi | 490153543  
gi | 548231998  
gi | 656268823  
gi | 497885042  
gi | 585249330

LA-LR-NFDTAKPDFDRLC AEAG----ITIQEL-----NDRYQECRAARAG-LGGALQ  
LA-LR-GFDTEKPDFPGLCAANH----TSIEDL-----QEKYQAEERAAKAG-SDDKLI  
LA-LR-GFDTANPNFRGLCAAH----ITIEDL-----IEKYQGERRAAKAG-SDDKLE  
LA-KY-GFNVSSPDYSFFSVGEQ---ELLSRMN-----ENIKSF----KNFKTYTELP-  
LA-KN-GFNVSLPDYSVFNIDKH---ELLSRMN-----ENIKHF----KNFKTYAELP-  
LA-KY-RFNVSSPDYSVFNIDKH---ELLSRMN-----ENIKHF----KNFKTYAELP-  
LA-SY-GFSVSLPDYSKLPVGGN---ELLEKMN-----ENIKPFRKRKSNKFNYSERP-  
LA-SY-GFSVSLPDYSKLPVGGN---ELLEKMN-----ENIKPFRKRKSNKFNYSERP-  
LW-NY-GVDTSDADFTKLC EDEK---VLEKAN-----KIIRSV-KGFNE---WKQLD-  
LW-NY-GVDTSDADFTKLC EDEK---VLEKAN-----KIIRSV-KGFNE---WKQLD-  
LW-NY-GVDTSDADFTKLC EDEK---VLEKAN-----KIIRSV-KGFNE---WKQLD-  
LW-NY-GVDTSDADFTKLC EDEK---VLEKAN-----KIIRSV-KGFNE---WKQLD-  
LW-NY-GIDTSNADFTKLC EDES---ILLENAN-----KIIRKI-KGLNE---WKQLD-  
LW-NY-GIDTSNADFTKLC EDES---ILLENAN-----KIIRKI-KGLNE---WKQLD-  
LW-NL-KIDTEDAEYAETGFEPQ---ALLDRVN-----ALRTRV-KGFHP---IEKLD-  
LW-NL-KIDTEDAEYAETGFEPQ---ALLDRVN-----ALRTRV-KGFHP---IEKLD-  
LS-TY-GLDTKCPDYNNSQLONKISSDSLLEKYITCGLSTSKKGV-KPENM----TELP-  
LA-TH-GVLAERPDLDR-L-QORQ---PQLENEY-----RAVERS-LGFRERGLQPNRDG  
LA-TH-GVLAERPDLDR-L-QORQ---PQLENEY-----RAVERS-LGFRERGLQPNRDG  
LA-TY-GIWTAEPSFDALRRVP---D-LDDRY-----RQAQRD-QGFRK---QYPLPS  
LQORFPGGLGDDRIDWALFGDPA---ARQRY-----RVAGELGAGST---TPP-  
LS-LY-ILNVSXKAEYLSMKYPNK---PEYDKKEAVEKLEVFKRKVLEIKKQIF-TRCDDY  
LA-TR-GVWVEKPDLDQ-L-KAQI---PDLDRSY-----RAVERT-LGFRERGLQPNRDG  
LA-TY-SVWTAAPSFDALQRPV---D-LNQQY-----RQAQCE-QGFRK---VYDLP-  
LKVRFPFGFDDSDPEYDLISTDQ---QFKRSW-----TDMNLDVGGQKRR---SLP-  
LSSEF-GLDPVDPDYTKLGDVED---LTTRYA-----ALTTEVYGAPT---TLP-  
LA-EY-NLFVSGMNYKVKYNLKR-PEFAQLSSKDRYDLLKQKVCIEIKKQLFGTGESPR  
LA-GY-NLYVSKMNYKEIKVNIQH-PEWDGIDAKELFRQIKERYLDMKIQLFKGTGNTY  
LA-EY-GILSERPNDFR-GAGR---SAEQRY-----RQVQKS-VGRKQCYPLPER--  
LL-KH-GIYTANASFSHLDQOQL---LKDYNVL-----GEQVFPNRYRPLHY  
LENKYAGFRCDPEPDSLLEGEVGE-----EY-----ARVSAGMPGKESG----LP-

gi | 499548365  
gi | 570755047  
gi | 499487817  
gi | 551068805  
gi | 516806813  
gi | 740203173  
gi | 489138195  
gi | 518381449  
gi | 746416481  
gi | 503470028  
gi | 740224592  
gi | 746419752  
gi | 740218035  
gi | 517272690  
gi | 511098904  
gi | 753938889  
gi | 296849607  
gi | 701167105  
gi | 502941971  
gi | 648543053  
gi | 654417026  
gi | 502777546  
gi | 654402559  
gi | 302777911  
gi | 779961749  
gi | 505124139  
gi | 502759809  
gi | 655943915  
gi | 125715920  
gi | 489607383  
gi | 754095284  
gi | 489611620  
gi | 504021345  
gi | 653611173  
gi | 605572971  
gi | 740811186  
gi | 516314532  
gi | 655011063  
gi | 670513542  
gi | 500595682  
gi | 301057067  
gi | 757183905  
gi | 501216200  
gi | 501070122  
gi | 703489217  
gi | 559063203

--AKLGLLDLLAFRLKGD EALGRLS----LAELRGLAGALKGRNSALLVHGFDVPSPKA  
--AKLGLLDLLAFRLKGD EALGRLS----LAELRGLAGALKGRNSALLVHGFDVPSPKA  
--AKLGLLDLLAFRLKGD EALGRLS----LAELRGLAGALKGRNSALLVHGFDVPSPKA  
--AKLGLLEILAFRAHGDSVVGGLP----LAELQGLSGVLKARNEALLVHGFPVPTQNE  
--PKLGLLHLVAFRLKGD SLLATLP---QERLMGLSGVLKARNESLLVHGFLVPREKE  
--PKLGLLDLVAFLRLQADPLAREP---LERLRGLSGALQARNASLLVHGLGRPSDKD  
--KKLGLLHLIGLRLLDG PPLAGKP---AGELRGLGGVLQARNSTLLIHGFEVPTGRQ  
-GAKLGLLDLVAFLRILGDPV LASQ---KVEALQGLAGVLKARN DALLIHGFAVPSEKE  
-GAKLGLLDLVAFLRILGDPV LASQ---KVEALQGLAGVLKARN DALLIHGFAVPSEKE  
-GPKLGLLEVLVAFLRVLGDPV LKKG---GVKELQGLAGVLKARNQALLIHGLEVPSEKQ  
-GDRGLLDLVMFAFLRVLGDPV LKGM---SLQEVQGLKGVLQARNQSLVHGLVQVPTKEK  
--EKLGLLEVLVAFLRVLGDPV LASWN---VRDLQGLAGVLKARNQALLIHGFLVQVPSARQ  
-HDKLGLFGMAILLIVKDCSVOGIF---DQKRLKALSALQSRNSSLLIHGFDFPNEKQ  
-PERFGLLHLLAYLKAKDHPAFRHL---DSKRLQGLQALRARNKALLIHGLEGPKEGD  
-PERFGLLHLLAYLKAKDHPAFRHL---DPKRLQGLQALRARNKALLIHGLEGPKEGD  
-ITKGLLES SMALLRYLEDPLDNF---SENDLQGYQGMLQSRNKSLLIHGLEVS KKGD  
-ITKGLLES SMALLRYLEDPLDNF---SENDLQGYQGMLQSRNKSLLIHGLEVS KKGD  
-KPKLGLLELVVYLSILND DAVKEVF---DQESIKKLCWNLEARNASLLIHGLKTPSERE  
QGPVPLFESYLLLGALEDPLVKAL---VHRQNDLMGLAELRNQSLWIHGYP ISEKA  
QKTVDVDFVTAFFLLRALGDNAQA V-----NPNKLVGLAKARNSSVFAHGFEPPKEGM  
QKIADVLTITAFLLRALGD EDPALAV-----NANKVLGLSSARDNSIFAHGFLPTKAN  
EKNAVDFITAFLLRALGD GPPALAV-----NVNKLGLTKTRNASVFAHGFTLPTEDN  
QKSAIDFTTAFLLRALGD EDPALAV-----SANKVLGLASARDNSIFAHGFLPTKAN  
-QNSMALFDAYVILKAI EDELMEGIN-----IGLIYSNVQLRNKSIPTHGFGMLSNKD  
-NNSIALFDAYVILKAI EDELMEGIN-----IGMIYSNVKLRNKSIFAHGFGILSND  
-NNSIALFDAYVILKAI EDELMEGIN-----IGMIYSNVKLRNKSIFAHGFGILSND  
-QSSISLFDAYVILKAI EDKLVKDI E-----LGLIYRNVKLRNKSIFAHGFGILMEKD  
-QSSISLFDAYVILKAI EDKLVKDI E-----LGLIYRNVKLRNKSIFAHGFGILMEKD  
--KKISLLAGYILAAVGD DIKTKKPGKEIDSINRLRNKVEARNNSIFAHGYEFISKEK  
--KKISLLAGYILAAVGD DIKTKKPGKEIDSINRLRNKVEARNNSIFAHGYEFISKEK  
--KKISLLAGYILAAVGD DIKTKKPGKEIDSINRLRNKVEARNNSIFAHGYEFISKEK  
--KKISLLAGYILAAVGD DIKTKKPGKEIDSINRLRNKVEARNNSIFAHGYEFISKEK  
--RKISLLAGYILAAVGD EIMTKKPGKETDSINRLRSKVDVRNNSIFAHGYEFISKEK  
--KQISLITAGFILLAALEDDIIRT KKPDAVIGRIESLKNKVDLRNKSIFAHGFTFIDADK  
--KQISLITAGFILLAALEDDIIRT KKPDAVIGRIESLKNKVDLRNKSIFAHGFTFIDADK  
--NIIDLINGYKLLKALDDPLAIDQD-----LNRI TNQVNI RNNSIFAHGFKPLNDNS  
QYNPITLLNGYMLL KALRDPVRSIN-----LADIQNRVSVRNKSILAHGFRQITETE  
RYNPITLLDG YMLIKALQDPLVQSVN-----LADIQNRVSVRNKSILAHGFRQITETE  
SERSIALFDGYMLLQALDDPLVRGW-----NIGDIRQSRVNRNKSILAHGFRPISSE  
--SRLMLMSSVKLLCAYDDELTRRCG-LDDADGIRGLEDTKRNKSVLAHGFTVTVGE  
LQPQVALLEGYIYLALED TLMGTNT-KSRLNYLKKLRSMVFLRNNSIFAHGFLVSKED  
QYSSITLLNGYMLL TALSDPLIQITIT-----LTDIRQVRNVRNKSILAHGFRQITEAE  
-ERSIALFDGYMLLQALDDPLVREW-----DIGLVRQSRVNRNKSILAHGFRQISRHE  
--PFIGLFSAAVLRVLDLRLLAG-LWEVDELRSRLRDLARVNRNDSVLAHGDRSVSKTD  
--RKIALMDAMLLLCKD DAVLKRIG-WTPSSISSMRGVVDTNRNRSVLAHGFTASVSMQD

gi | 490153543 LQKQVSLMEGFVILHALGDPI TADPA-GESVERLEQIRKMVFLRNHSIFAHGLGPVGFQD  
gi | 548231998 MPEQISLLEGFILLALDDEMLVRGN-SSVIDKLRIRAMVYLRNNSIFAHGLGPVQSQTD  
gi | 656268823 ---AFGLFVGYMLLKALEDLVHDLSD-----IGMIEARSAARNTSMLTHGFRLIDQVE  
gi | 497885042 FPNKITLMSGLILLRALQEPMVRDIG-----LADMNNMITLRNKSRLVHGFELLTEEQ  
gi | 585249330 --AKVSLVEAAKLLVALKDGFAVATQ-LAKGSGIVSLASLAATRNSILAHGFQIAPSD

\* \*\*

gi | 499548365 VEGIARLAOGLLODLE--ARTALGPL-S-PE----PVP-----LGF-----  
gi | 570755047 VEGIARLAOGLLODLE--ARTALGPL-S-PE----PVP-----LGF-----  
gi | 499487817 VEGIARLAOGLLODLE--ARTALGPL-S-PE----PVP-----LGF-----  
gi | 551068805 VGQLQRLAQRLLLEDLE--ARSGVRGV-P-WD----PVP-----LGF-----  
gi | 516806813 LQSLLSLAQRLEGEDLA--A--GARP--S-LE----PVP-----LGF-----  
gi | 740203173 LEQVRKLARSLLLEGLQ--REVG PAP--R-LA----PVE-----LSF-----  
gi | 489138195 VGALKGLAKDLLADLD--KELGPAV--S-LE----PLP-----LGF-----  
gi | 518381449 LKQIRNLLQPLLADLR--ERAGLRVS-----LHPVA-----LGSTF-----  
gi | 746416481 LRQIRNLLQPLLADLR--ERAGLRVS-----LHPVA-----LGSTF-----  
gi | 503470028 VKQVQTALRVLLGALQ--EELAYRTD-----LKTIP-----LERV-----  
gi | 740224592 VGKVAKGAKGLLRALQ--DELRLQPS-----LEPAP-----LEFWGRREE--  
gi | 746419752 VEQVAGLARKLLQDLQ--REVGLQP--D-LEAI--PLP-----R-----  
gi | 740218035 VEYIKKCAKRLKLDLE--IRAELRLD--PSIDMCFEKAG-----LDFPKW-----  
gi | 517272690 VDQVARLARELLKGLG--VEAK-----AEPIP-----L-----  
gi | 511098904 VDQVARLARELLKGLG--VEAK-----AEPIP-----L-----  
gi | 753938889 VEKLOQFARKLYLTTR--EEAKLALS-----VEPVE-----LM-----  
gi | 296849607 VEKLOQFARKLYLTTR--EEAKLALS-----VEPVE-----LM-----  
gi | 701167105 NERLQEKAEKLAKTIK--KSEDVFSF-----VEALK-----IDKGILRFEEL  
gi | 502941971 YRKLASLLSPLHEALL--QLEGRSER---CPASAVPLP-----  
gi | 648543053 ANDLAQVLOTLV-----ERGGLPKV-E-----YSPIP-----LA-----  
gi | 654417026 ADNLSEVLTDLV-----RKGG LSEV-R-----FEPIP-----LP-----  
gi | 502777546 AKNLSEVLVALV-----QSGGLPEV-R-----FEPIP-----LS-----  
gi | 654402559 AKNLSEVLMALV-----QGGDLPEV-K-----FEPIP-----LA-----  
gi | 302777911 FDKIRKTVKRIPTSFY--EIEGIDF-----  
gi | 779961749 FDKFHEIVRKIFIRFC--DLENINFE-S-ICGNYKFIL-----LS-----  
gi | 505124139 FDKFHEIVRKIFIRFC--DLERINFE-S-VCSNYKFIL-----LS-----  
gi | 502759809 FNDFHETVKKILIRFC--EIERIEFE-K-VCKDYKFVL-----LE-----  
gi | 655943915 FNDFHETVKKILIRFC--EIERIEFE-K-VCKDYKFVL-----LE-----  
gi | 125715920 YNEFKKVVEDYMNLLC--SIEGIDKE-E-LFDSCEFIK-----L-----  
gi | 489607383 YNEFKKVVEDYMNLLC--SIEGIDKE-E-LFDSCEFIK-----L-----  
gi | 754095284 YNEFKKVVEDYMNLLC--SIEGIDKE-E-LFDSCEFIK-----L-----  
gi | 489611620 YNEFKKVVEDYMNLLC--SIEGIDKE-E-LFDSCEFIK-----L-----  
gi | 504021345 YMEFKKVVEDYIDLCC--SIDCINKE-E-IFSICKFIN-----L-----  
gi | 653611173 YMEFKKVVEDYIDLCC--SIECINKD-E-IFSICEFIN-----L-----  
gi | 605572971 YSQFKAADVDEYVDRFF--HLEELDRD-E-AFGPMNFIT-----LSAD-----  
gi | 740811186 YSQFKAADVDEYVDRFF--HLEELDRD-E-AF-----  
gi | 516314532 FMSFKTLVESLVDIFK--TIQENQA-Y-WNDCI-FVE-----EIV-----  
gi | 655011063 YRDFVSVVEQVLDQFF--ITTKHRRE-D-WEEQYQFVK-----L-----  
gi | 670513542 YRDF-----  
gi | 500595682 YEQFADIVEELLDRFF--ALIGRSRQ-E-WERVHRFVS-----LAA-----  
gi | 301057067 TEELRRRADSLQVYW--ELHGD TGSLDEMCDRLQFVRTDR-----  
gi | 757183905 FTRFKNFVILLQRFC--AIEEIDFA-Q-ISEDILWINPLESKYCMHVLLHI---  
gi | 501216200 YREFARVVEQLDQFF--TIAQEQRS-S-WEERYRFIE-----LPAT-----  
gi | 501070122 YEQFADIVENVLDRFF--TIAQLPRY-E-WEQTYHFVT-----LAV-----  
gi | 703489217 SEQLNSMAQSVVRAYW--TLHHADENLDELRLRIRAGR-----  
gi | 559063203 SAQLSGRAGALLRYFL--QVHAPNODITERIKTLRFVSEL-----  
gi | 490153543 FHKFQCFVLDLQFLFC--SLEQIPYQ-E-YRENMTWVNPLTSKYDTGM-GE-----  
gi | 548231998 YLKFKFSVLELFRFC--DIEQISFA-Q-YNSKMTWITPFDSVYVYSGLEGN-----  
gi | 656268823 YESFCEVVEQLERYL--QLVCVSRA-D-WETTFRFVA-----IDVLTNPEE--  
gi | 497885042 VEGFYNRKIGLSNFVWNHDKHNLKVEVG--FEFSSPYSFVN--ISLRSRLVSV---  
gi | 585249330 SQKLGERAFFLKKLW--ELERPSDNLDELRLNLA FVRQGT-----
